# Supplementary material
Source: HighWire-hosted journal article supplement (https://fn.bmj.com/content/105/4/369)
Supplement: inline-supplementary-material-4 [file inline-supplementary-material-4.pdf]

**Figure 3S (online supplement):** Secondary outcome Above% individualized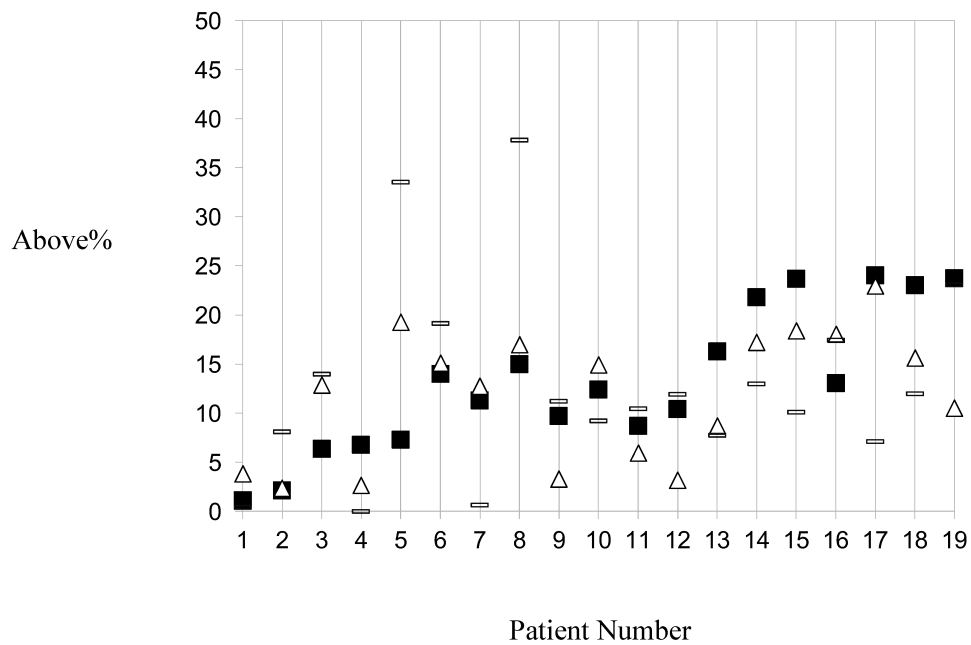

Individual secondary outcome variable: percentage of time spent above SpO<sub>2</sub> target range (Above%) when FiO<sub>2</sub> was >0.21. Individuals are sorted from highest to lowest by percentage of Target% during CLAC<sub>fast</sub>. Comparisons between RMC<sub>only</sub> (-) and RMC support by CLAC<sub>fast</sub> ■ or CLAC<sub>slow</sub> △, respectively.
